# Supplementary material
Source: MDPI journal article supplement (https://www.mdpi.com/2227-9040/11/7/392)
Supplement: s1 [file s1]

## 1. XPS characterization

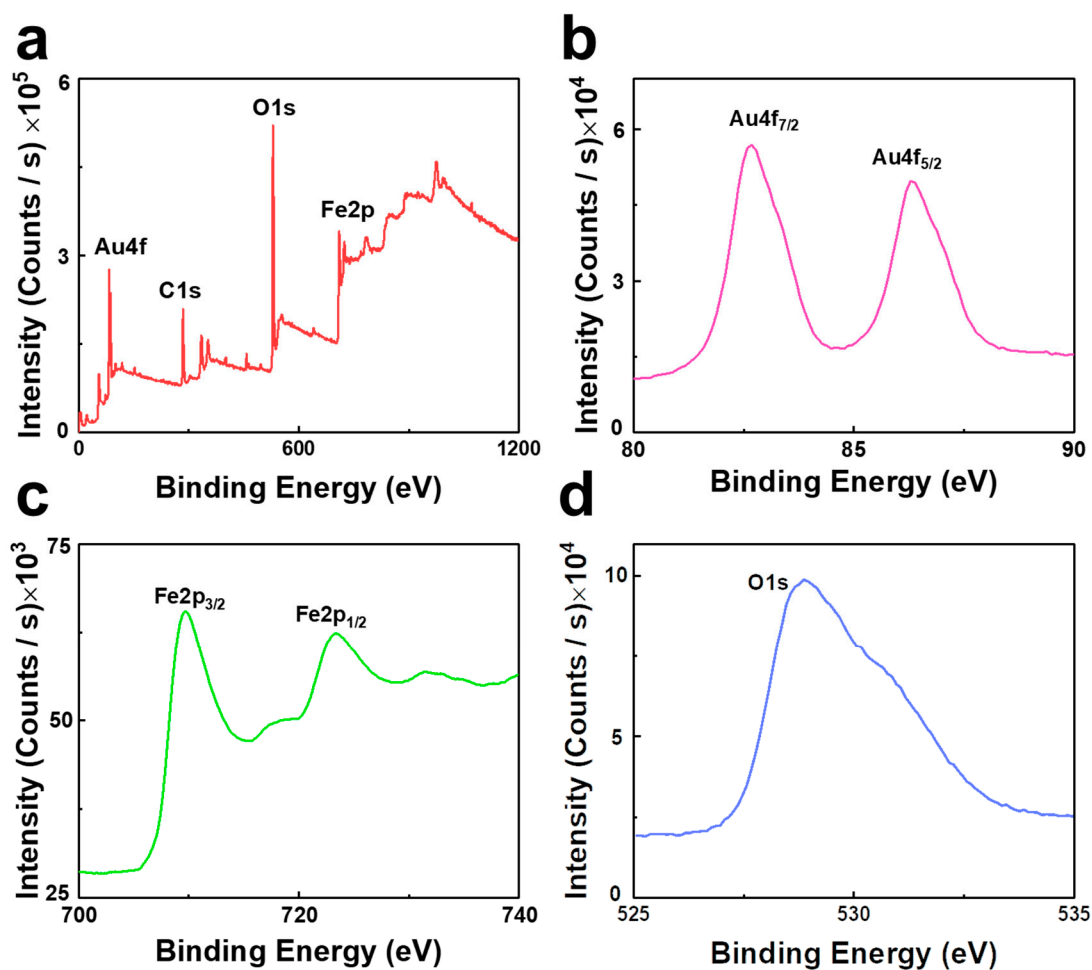

Figure S1. (a) XPS full spectrum of Au@Fe<sub>3</sub>O<sub>4</sub> nanozymes. (b) The high-resolution XPS spectra of Au4f. (c) The high-resolution XPS spectra of Fe2p. (d) The high-resolution XPS spectra of O1s.

## 2. XRD characterization

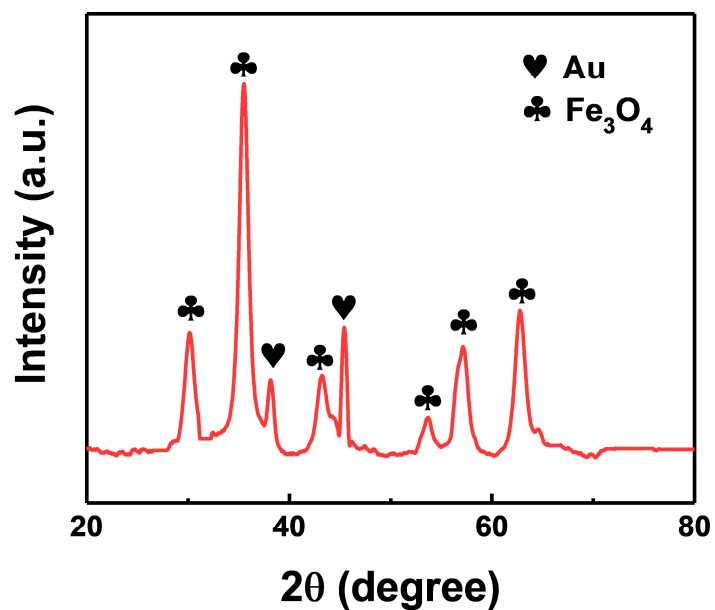

Figure S2. XRD spectra of Au@Fe<sub>3</sub>O<sub>4</sub> nanocomposites.

### 3. Magnetization curves of Fe<sub>3</sub>O<sub>4</sub> and Au@Fe<sub>3</sub>O<sub>4</sub> nanocomposites

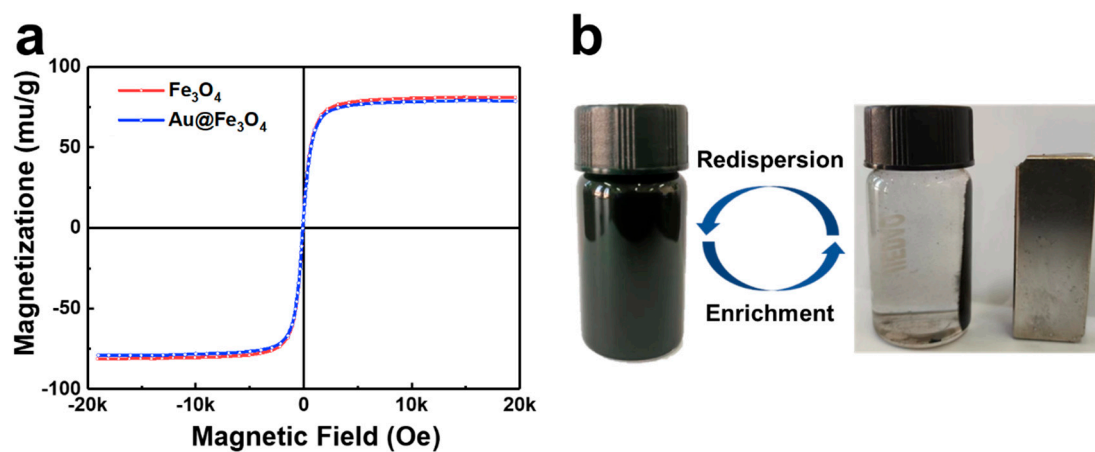

Figure S3. (a) Magnetization curves of Fe<sub>3</sub>O<sub>4</sub> (red) and Au@Fe<sub>3</sub>O<sub>4</sub> nanocomposites (blue) at 300 K. (b) Picture of the enrichment and redispersion process of Au@Fe<sub>3</sub>O<sub>4</sub> nanocomposites: no external magnetic field applied (left) and external magnetic field applied (right).

### 4. Catalytic process

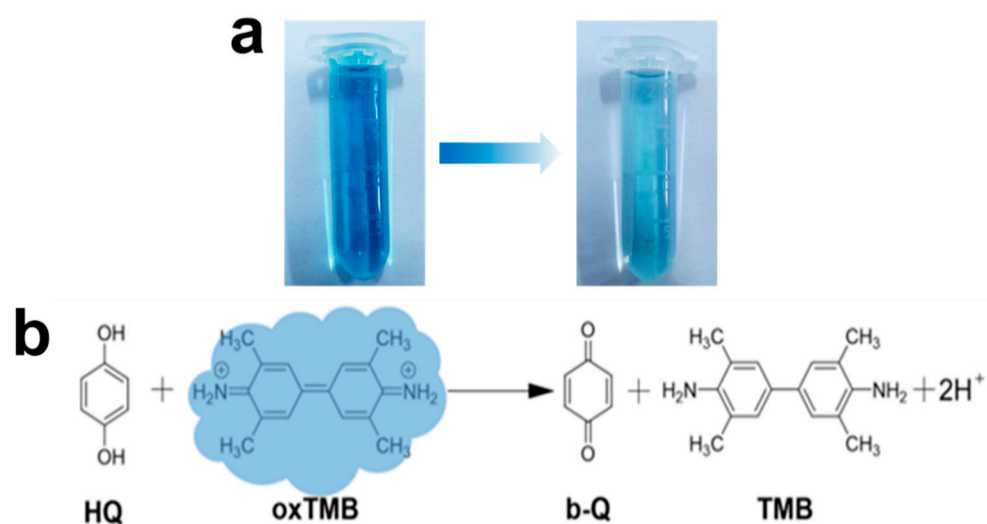

**Figure S4.** (a) Physical photographs of colorimetric reactions. (b) The reaction formula of HQ is determined by colorimetry.

### 5. Short-term stability

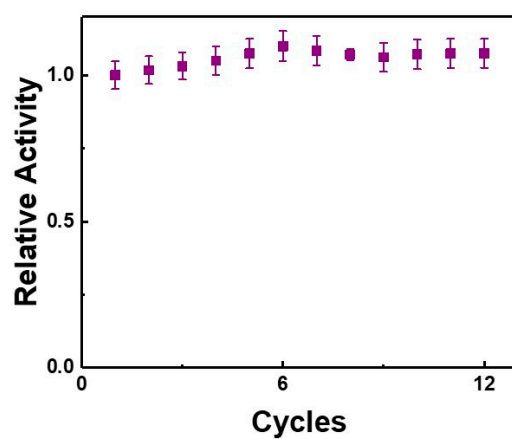

**Figure S5.** The short-term stability of Au@Fe<sub>3</sub>O<sub>4</sub> nanozymes.
